# Supplementary material for: Mechanistic Insights of Polyphenolic Compounds from Rosemary Bound to Their Protein Targets Obtained by Molecular Dynamics Simulations and Free-Energy Calculations
Source: MDPI journal article supplement (doi:10.3390/foods12020408), 2023-01-14
Supplement: s1 [file s1]

Supplementary materials

**Table S1.** Top three molecular docking scores of carnosic acid, carnosol and rosmanol with HIV-1 protease.

| Ligand        | Score 1  | Score 2  | Score 3  |
|---------------|----------|----------|----------|
| Carnosic acid | -21.4106 | -21.3113 | -21.2960 |
| Carnosol      | -22.0796 | -21.7720 | -21.7070 |
| Rosmanol      | -19.0478 | -18.6083 | -18.5903 |

**Table S2.** The average electrostatic and van der Waals nonbonded contributions of carnosic acid, carnosol, rosmanol, 7O-methylrosmanol and 7O-ethylrosmanol binding to HIV-1 protease, along with the corresponding binding free energies calculated using the LIE method, with parameters obtained by Huang et al. (a) and Hansson et al. (b).

| Ligand/<br>Parameter set          | vdW contribution (kcal/mol) | Coulomb contribution (kcal/mol) | $\Delta G_{\text{BIND}}$ (kcal/mol) |
|-----------------------------------|-----------------------------|---------------------------------|-------------------------------------|
| <i>Carnosic acid</i>              |                             |                                 |                                     |
| (a) $\alpha = 0.17, \beta = 0.02$ | $-1.66 \pm 0.18$            | $-0.09 \pm 0.01$                | $-1.76 \pm 0.18$                    |
| (b) $\alpha = 0.18, \beta = 0.50$ | $-1.76 \pm 0.19$            | $-2.34 \pm 0.17$                | $-4.10 \pm 0.29$                    |
| <i>Carnosol</i>                   |                             |                                 |                                     |
| (a) $\alpha = 0.17, \beta = 0.02$ | $-1.41 \pm 0.33$            | $-0.04 \pm 0.14$                | $-1.45 \pm 0.21$                    |
| (b) $\alpha = 0.18, \beta = 0.33$ | $-1.50 \pm 0.36$            | $-0.66 \pm 2.24$                | $-2.16 \pm 1.90$                    |
| <i>Rosmanol</i>                   |                             |                                 |                                     |
| (a) $\alpha = 0.17, \beta = 0.02$ | $-1.34 \pm 0.40$            | $-0.17 \pm 0.15$                | $-1.51 \pm 0.28$                    |
| (b) $\alpha = 0.18, \beta = 0.33$ | $-1.42 \pm 0.42$            | $-2.73 \pm 2.51$                | $-4.15 \pm 2.17$                    |
| <i>7O-methylrosmanol</i>          |                             |                                 |                                     |
| (a) $\alpha = 0.17, \beta = 0.02$ | $-1.11 \pm 0.40$            | $-0.23 \pm 0.15$                | $-1.33 \pm 0.26$                    |
| (b) $\alpha = 0.18, \beta = 0.50$ | $-1.17 \pm 0.42$            | $-3.76 \pm 2.47$                | $-4.93 \pm 2.07$                    |
| <i>7O-ethylrosmanol</i>           |                             |                                 |                                     |
| (a) $\alpha = 0.17, \beta = 0.02$ | $-0.80 \pm 0.03$            | $-0.30 \pm 0.02$                | $-1.10 \pm 0.02$                    |
| (b) $\alpha = 0.18, \beta = 0.50$ | $-0.85 \pm 0.03$            | $-5.00 \pm 0.29$                | $-5.85 \pm 0.26$                    |

**Table S3.** Top three molecular docking scores of carnosic acid, carnosol and rosmanol with K-RAS.

| Ligand        | Score 1  | Score 2  | Score 3  |
|---------------|----------|----------|----------|
| Carnosic acid | -20.5045 | -19.9349 | -19.8753 |
| Carnosol      | -23.6509 | -23.5006 | -22.7920 |
| Rosmanol      | -21.5713 | -21.5423 | -21.4942 |

**Table S4.** Top three molecular docking scores of rosmarinic acid with factor X.

| Ligand          | Score 1  | Score 2 | Score 3  |
|-----------------|----------|---------|----------|
| Rosmarinic acid | -21.4923 | -21.123 | -20.1228 |

**Table S5.** Interaction frequencies (%) between HIV-1 protease and diterpenic ligands. Values larger than 100% are possible because multiple atoms of each aminoacid residue can interact with multiple atoms within the ligand.

| Carnosic acid | %      | Carnosol | %      | Rosmanol | %      | 7O-methyl<br>rosmanol | %      | 7O-ethyl-<br>rosmanol | %      |
|---------------|--------|----------|--------|----------|--------|-----------------------|--------|-----------------------|--------|
| ILE47A        | 1597,1 | ILE149B  | 1265,2 | ILE149B  | 1171,2 | ILE149B               | 1077,7 | ILE47A                | 1575,4 |
| ILE84A        | 1583,4 | ILE47A   | 1204,2 | ILE84A   | 937,9  | ILE47A                | 1071,7 | ILE84A                | 1434,2 |
| VAL32A        | 1400,9 | ILE84A   | 1188,5 | ILE47A   | 928,6  | ILE50A                | 1054,1 | VAL82A                | 1362,4 |
| VAL181B       | 1361,1 | VAL181B  | 936,3  | ILE50A   | 913    | ILE84A                | 1046,6 | VAL32A                | 1130,0 |
| ILE149B       | 1313,2 | VAL32A   | 923,0  | VAL82A   | 772,8  | VAL82A                | 989,6  | ILE54A                | 1112,0 |
| ARG107B       | 1194,5 | ILE50A   | 913,1  | LEU23A   | 679,6  | PRO81A                | 792,3  | PRO81A                | 1106,4 |
| ASP29A        | 1166,4 | ILE183B  | 739,2  | VAL32A   | 647,7  | VAL32A                | 786,1  | ILE149B               | 1049,3 |
| ASP30A        | 1147,6 | PRO180B  | 729,6  | ARG8A    | 638,2  | ILE54A                | 698,2  | THR80A                | 1010,3 |
| LEU122B       | 1048,8 | ALA28A   | 687,3  | ALA28A   | 636,8  | ALA28A                | 670,6  | ARG8A                 | 867,1  |
| PRO180B       | 1017,5 | ARG107B  | 666,0  | VAL181B  | 627,7  | THR80A                | 659,4  | ALA28A                | 839,5  |
| ALA28A        | 985,9  | VAL82A   | 557,9  | ILE183B  | 614,3  | ILE183B               | 577,9  | LEU23A                | 816,2  |
| ILE50A        | 791,4  | LEU122B  | 549,8  | ARG107B  | 601,2  | LEU23A                | 565,3  | ASP25A                | 782,3  |
| ILE183B       | 770,6  | ASP30A   | 548,8  | ILE146B  | 545,2  | ASP25A                | 563,6  | ILE50A                | 680,6  |
| LEU76A        | 715,2  | ASP29A   | 521,7  | PRO81A   | 537,8  | GLY48A                | 529,2  | GLY48A                | 585,4  |
| GLY48A        | 590,0  | GLY48A   | 513,7  | GLY148B  | 522,7  | GLY49A                | 520,7  | ASP30A                | 494,6  |
| THR31A        | 515,9  | GLY49A   | 513,6  | PRO180B  | 520,8  | ILE153B               | 493,6  | GLY49A                | 422,8  |
| GLY27A        | 495,4  | PRO81A   | 428,9  | ASP25A   | 490,7  | ARG8A                 | 492,9  | GLY148B               | 350,1  |
| GLY49A        | 490,2  | ILE54A   | 376,0  | ILE153B  | 477,7  | ILE146B               | 484,6  | GLY27A                | 339,7  |
| ASP25A        | 354,8  | ASP25A   | 371,7  | ALA127B  | 456,6  | GLY148B               | 471,3  | GLY126B               | 285,1  |
| THR179B       | 286,3  | THR80A   | 351,4  | VAL131B  | 446,1  | VAL131B               | 464,5  | ASP29A                | 198,3  |
| GLY86A        | 200,8  | GLY148B  | 330,9  | THR179B  | 445    | THR179B               | 428,6  | ALA127B               | 191,4  |
| VAL56A        | 135,3  | GLY27A   | 312,3  | GLY49A   | 435,4  | VAL181B               | 414,9  | LEU76A                | 183,0  |
| THR80A        | 123,8  | ILE146B  | 296,1  | GLY126B  | 402    | PRO180B               | 370,3  | GLY147B               | 166,6  |
| ASP124B       | 76,5   | ILE153B  | 272,1  | GLY48A   | 396,6  | ARG107B               | 356,3  | PRO79A                | 164,5  |
| ILE54A        | 64,3   | THR179B  | 271,2  | LEU122B  | 359,4  | ASP30A                | 355,5  | THR31A                | 146,4  |
| GLY150B       | 64,1   | LEU23A   | 270,0  | GLY147B  | 354,4  | ASP124B               | 354,0  | VAL56A                | 141,7  |
| GLY148B       | 53,8   | LEU76A   | 249,0  | ASP29A   | 344,9  | GLY27A                | 343,3  | ASP124B               | 122,0  |
| LYS45A        | 49,2   | GLY147B  | 221,3  | THR80A   | 333,1  | GLY147B               | 303,8  | ASP128B               | 113,9  |
| ILE153B       | 38,1   | ARG8A    | 206,0  | ASP124B  | 322,9  | ALA127B               | 297,0  | ILE146B               | 97,9   |
| ARG87A        | 36,5   | THR31A   | 198,6  | GLY27A   | 259,5  | LEU122B               | 274,7  | GLY52A                | 97,7   |
| LEU109B       | 22,3   | VAL131B  | 182,7  | ASP128B  | 250,9  | ASP29A                | 240,3  | GLY51A                | 87,9   |
| VAL82A        | 18,6   | ASP124B  | 178,5  | ASP30A   | 212,9  | GLY126B               | 231,4  | ILE183B               | 60,3   |
| PHE53A        | 16,2   | ALA127B  | 152,1  | ILE54A   | 141,6  | PRO178B               | 149,9  | PHE53A                | 58,6   |
| GLY51A        | 10,0   | GLY126B  | 116,5  | PRO178B  | 123,1  | THR31A                | 131,8  | GLY150B               | 52,8   |
| ASN182B       | 9,3    | GLY150B  | 101,6  | LEU76A   | 110,8  | LEU76A                | 126,5  | ILE153B               | 47,4   |
| ILE146B       | 8,2    | PHE53A   | 98,6   | PHE53A   | 106    | GLY51A                | 101,3  | GLY86A                | 46,1   |
| ILE85A        | 7,3    | GLY86A   | 84,1   | GLY51A   | 105,2  | VAL155B               | 84,2   | VAL181B               | 44,0   |
| VAL131B       | 7,2    | GLY151B  | 77,3   | VAL155B  | 71     | GLY52A                | 74,5   | PRO180B               | 43,0   |
| PRO81A        | 5,8    | VAL56A   | 67,7   | GLY150B  | 60,8   | GLY150B               | 65,3   | THR179B               | 33,8   |
| GLY147B       | 5,4    | PHE152B  | 62,0   | THR31A   | 50,1   | GLY151B               | 65,2   | VAL131B               | 28,6   |
| MET46A        | 5,0    | ASP128B  | 52,0   | VAL56A   | 46,6   | ASP128B               | 59,5   | GLY78A                | 25,4   |
| PRO108B       | 4,9    | ARG87A   | 40,4   | LEU109B  | 46,1   | PHE152B               | 52,5   | ARG107B               | 24,3   |
| GLY52A        | 4,0    | GLY52A   | 38,6   | ARG87A   | 40,8   | PRO79A                | 51,3   | PRO9A                 | 18,8   |
| GLY151B       | 2,4    | ASN182B  | 36,6   | LYS45A   | 34,5   | VAL56A                | 47,6   | ASN83A                | 17,6   |
| ALA127B       | 2,1    | GLY51A   | 35,7   | MET46A   | 28,3   | GLY86A                | 40,3   | LEU10A                | 12,8   |
| PRO178B       | 1,0    | LEU109B  | 34,5   | THR125B  | 25,9   | PHE53A                | 36,4   | PHE152B               | 11,7   |
| GLY126B       | 0,8    | VAL155B  | 16,7   | LEU10A   | 24,8   | GLY177B               | 35,0   | THR125B               | 10,5   |
| VAL155B       | 0,4    | ASN83A   | 14,9   | ASP129B  | 23,3   | ASN83A                | 23,5   | ARG186B               | 10,3   |
| PRO79A        | 0,4    | PRO108B  | 13,5   | PRO9A    | 19,8   | ASP129B               | 18,8   | LYS45A                | 9,4    |
| THR26A        | 0,2    | MET46A   | 12,6   | GLY86A   | 19,2   | LEU175B               | 16,8   | ILE85A                | 8,2    |
| LEU23A        | 0,2    | PRO178B  | 12,3   | GLY52A   | 19,1   | LEU109B               | 13,6   | GLY151B               | 8,1    |
|               |        | LYS45A   | 9,5    | GLY177B  | 18,1   | THR125B               | 13,6   | THR26A                | 5,9    |
|               |        | THR26A   | 8,4    | ARG186B  | 17,2   | PRO9A                 | 10,3   | LEU122B               | 5,3    |
|               |        | LYS154B  | 8,1    | LEU175B  | 15,8   | ARG87A                | 8,8    | ASP129B               | 3,1    |
|               |        | LEU10A   | 6,7    | PHE152B  | 15,4   | ARG186B               | 7,0    | PRO178B               | 3,1    |
|               |        | ILE85A   | 5,6    | GLY151B  | 13     | PRO108B               | 6,7    | ILE33A                | 1,0    |
|               |        | ARG186B  | 4,6    | LEU24A   | 12,7   | LEU10A                | 6,4    | LEU24A                | 0,8    |

|         |     |         |     |         |     |         |     |
|---------|-----|---------|-----|---------|-----|---------|-----|
| MET145B | 4,0 | THR26A  | 9,4 | THR26A  | 4,9 | LYS55A  | 0,5 |
| LEU175B | 3,1 | ASN182B | 8,3 | ASN182B | 3,2 | VAL155B | 0,5 |
| PRO9A   | 2,4 | ASN83A  | 7,7 | ILE85A  | 3,0 | ARG87A  | 0,3 |
| THR125B | 2,1 | PRO108B | 3,8 | LEU24A  | 2,2 | MET46A  | 0,2 |
| LEU123B | 1,7 | PRO79A  | 1,6 | GLY78A  | 2,0 | LEU175B | 0,2 |
| ASP129B | 1,4 | ILE85A  | 1,1 | THR130B | 1,8 | GLY177B | 0,2 |
| PRO79A  | 1,2 | ILE132B | 0,8 | ILE132B | 1,6 | LYS144B | 0,1 |
| GLU133B | 0,7 | GLY78A  | 0,6 | LEU123B | 1,4 | ASN182B | 0,1 |
| ILE184B | 0,5 | GLY185B | 0,5 | MET46A  | 0,9 |         |     |
| LEU24A  | 0,3 | GLU120B | 0,3 | LYS45A  | 0,8 |         |     |
| GLU134B | 0,1 | THR130B | 0,3 | LYS154B | 0,5 |         |     |
| GLY78A  | 0,1 | ILE33A  | 0,2 | GLY185B | 0,3 |         |     |
| ILE132B | 0,1 | ILE184B | 0,1 | LYS144B | 0,3 |         |     |
| LYS55A  | 0,1 | LEU123B | 0,1 | ILE33A  | 0,1 |         |     |

**Table S6.** Interaction frequencies (%) between K-RAS and diterpenic ligands. Values larger than 100% are possible because multiple atoms of each aminoacid residue can interact with multiple atoms within the ligand.

| <b>Carnosic acid</b> | <b>%</b> | <b>Carnosol</b> | <b>%</b> | <b>Rosmanol</b> | <b>%</b> |
|----------------------|----------|-----------------|----------|-----------------|----------|
| ARG68B               | 1720,2   | ARG68B          | 2342,6   | ARG68B          | 2360,5   |
| TYR96B               | 1157,4   | MET72B          | 1581,7   | TYR96B          | 1524,5   |
| GLU62B               | 1090,6   | TYR71B          | 1507,4   | MET72B          | 1447,5   |
| GLN61B               | 945,9    | GLU62B          | 1399,0   | TYR71B          | 1417,5   |
| THR58B               | 914,4    | THR58B          | 1284,4   | GLU62B          | 1364,0   |
| CYS12B               | 803,0    | TYR96B          | 1218,6   | THR58B          | 1359,0   |
| ALA11B               | 795,7    | VAL9B           | 1183,0   | VAL9B           | 1274,0   |
| ALA59B               | 684,6    | VAL7B           | 1128,6   | CYS12B          | 969,5    |
| THR35B               | 663,7    | LEU56B          | 948,2    | ALA11B          | 965,0    |
| GLY60B               | 654,5    | GLU37B          | 891,4    | ALA59B          | 948,0    |
| PRO34B               | 619,6    | GLY60B          | 699,6    | VAL7B           | 925,5    |
| LYS16B               | 594,3    | ALA59B          | 680,0    | LYS16B          | 915,5    |
| GLY10B               | 512,8    | GLN61B          | 667,7    | GLY60B          | 700,0    |
| VAL9B                | 480,1    | PHE78B          | 586,9    | GLN61B          | 675,5    |
| HSD95B               | 474,4    | GLN99B          | 523,4    | GLY10B          | 671,5    |
| GLN99B               | 430,8    | ILE100B         | 426,5    | LEU56B          | 625,5    |
| MET72B               | 294,3    | GLY10B          | 393,7    | GLN99B          | 477,5    |
| GLU63B               | 222,9    | GLU63B          | 383,2    | ILE100B         | 433,5    |
| TYR71B               | 222,8    | ASP69B          | 378,9    | PHE78B          | 417,0    |
| ASP92B               | 180,5    | VAL8B           | 216,9    | ASP69B          | 267,5    |
| ARG102B              | 151,3    | ALA11B          | 197,9    | GLU37B          | 187,0    |
| ASP69B               | 120,1    | MET67B          | 142,8    | VAL8B           | 185,5    |
| SER65B               | 108,8    | TYR64B          | 125,0    | MET67B          | 169,5    |
| GLY13B               | 84,4     | LYS16B          | 115,4    | GLU63B          | 96,5     |
| TYR64B               | 79,3     | CYS12B          | 113,2    | ASP57B          | 95,0     |
| ILE36B               | 68,2     | HSD95B          | 110,4    | TYR64B          | 74,5     |
| ILE100B              | 66,3     | ASP57B          | 82,8     | GLY13B          | 74,0     |
| LYS88B               | 56,7     | GLY75B          | 47,0     | ASP92B          | 62,0     |
| VAL7B                | 49,0     | ARG73B          | 38,9     | HSD95B          | 54,0     |
| GLU37B               | 33,4     | GLN70B          | 20,6     | SER65B          | 30,5     |
| VAL103B              | 31,5     | VAL103B         | 18,5     | ARG102B         | 26,5     |
| MET67B               | 23,6     | SER65B          | 15,2     | PRO34B          | 25,5     |
| VAL14B               | 20,6     | ASP92B          | 7,7      | ARG97B          | 23,5     |
| VAL8B                | 12,4     | ARG102B         | 3,9      | LEU80B          | 14,0     |
| PHE78B               | 10,9     | THR74B          | 3,4      | VAL103B         | 10,0     |
| LEU56B               | 5,1      | LYS88B          | 1,3      | GLN70B          | 10,0     |
| ASP57B               | 4,5      | SER39B          | 1,2      | GLY75B          | 6,5      |
| GLU98B               | 3,1      | PRO34B          | 0,9      | VAL14B          | 4,5      |
| ASP33B               | 2,0      | LEU80B          | 0,3      | THR35B          | 4,0      |
| ALA66B               | 2,0      | THR35B          | 0,2      | LYS88B          | 3,5      |
| ASN86B               | 1,5      | ASP38B          | 0,2      | ILE93B          | 2,0      |
| LEU80B               | 1,3      | GLY13B          | 0,1      | ARG73B          | 1,5      |

|        |     |       |     |
|--------|-----|-------|-----|
| ARG97B | 1,0 | LYS5B | 0,1 |
| SER89B | 0,8 | LEU6B | 0,1 |
| GLN70B | 0,8 |       |     |
| ILE93B | 0,2 |       |     |

**Table S7.** Interaction frequencies between factor X and rosmarinic acid. Values larger than 100% are possible because multiple atoms of each aminoacid residue can interact with multiple atoms within the ligand.

| Rosmarinic acid | %      |
|-----------------|--------|
| GLN198A         | 1498,5 |
| TRP221A         | 1412,4 |
| GLU223A         | 1176,4 |
| CYS197A         | 821,0  |
| CYS226A         | 792,4  |
| GLU151A         | 778,8  |
| ARG228A         | 764,2  |
| LYS152A         | 751,4  |
| GLY222A         | 685,3  |
| ARG147A         | 642,7  |
| GLY224A         | 641,9  |
| TYR100A         | 597,4  |
| LYS231A         | 519,8  |
| SER201A         | 518,8  |
| ALA196A         | 468,5  |
| VAL219A         | 381,0  |
| SER220A         | 267,2  |
| LYS97A          | 263,9  |
| HSD57A          | 258,2  |
| PHE178A         | 242,5  |
| GLN61A          | 221,3  |
| GLY233A         | 217,5  |
| ASP195A         | 208,3  |
| GLY199A         | 178,2  |
| PHE41A          | 150,1  |
| THR99A          | 141,7  |
| ILE234A         | 138,3  |
| ASP200A         | 135,5  |
| CYS42A          | 107,1  |
| TYR235A         | 98,4   |
| GLU98A          | 94,3   |
| TYR60A          | 80,3   |
| GLN155A         | 69,7   |
| LYS229A         | 65,5   |
| ALA227A         | 49,3   |
| PHE95A          | 38,1   |
| SER177A         | 37,4   |
| VAL17A          | 37,4   |
| TYR232A         | 32,1   |
| CYS58A          | 32,1   |
| HSD149A         | 22,2   |
| GLY202A         | 11,0   |
| SER176A         | 9,8    |
| GLY40A          | 7,4    |
| ALA56A          | 6,1    |
| ASP103A         | 5,4    |
| THR96A          | 4,7    |
| MET184A         | 3,8    |
| ILE180A         | 3,7    |
| GLY146A         | 3,6    |
| VAL142A         | 2,7    |
| GLY153A         | 2,0    |

|         |     |
|---------|-----|
| GLY43A  | 1,8 |
| ILE179A | 1,7 |
| ASP101A | 1,0 |
| GLY230A | 1,0 |
| ALA55A  | 0,6 |
| ALA187A | 0,5 |
| ALA62A  | 0,3 |
| GLU194A | 0,2 |
| GLU154A | 0,2 |
| ASN35A  | 0,2 |
| ILE16A  | 0,1 |

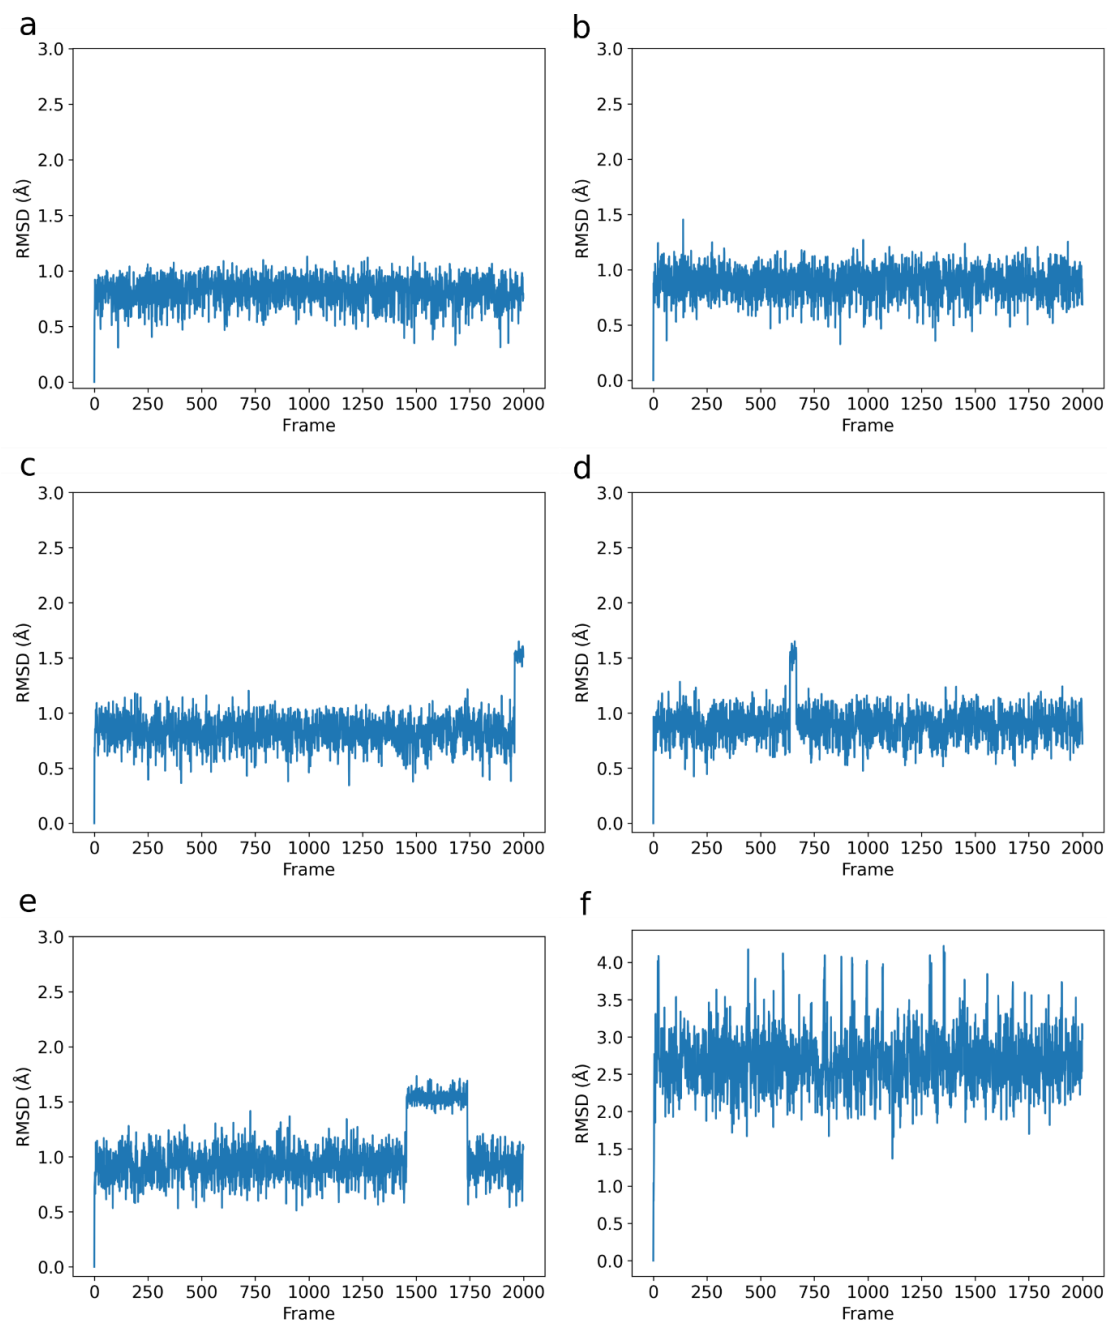

**Figure S1.** RMSD profiles of ligands in aqueous environment. (a) Carnosic acid, (b) Carnosol, (c) Rosmanol, (d) 7O-methylrosmanol, (e) 7O-ethylrosmanol, (f) Rosmarinic acid.

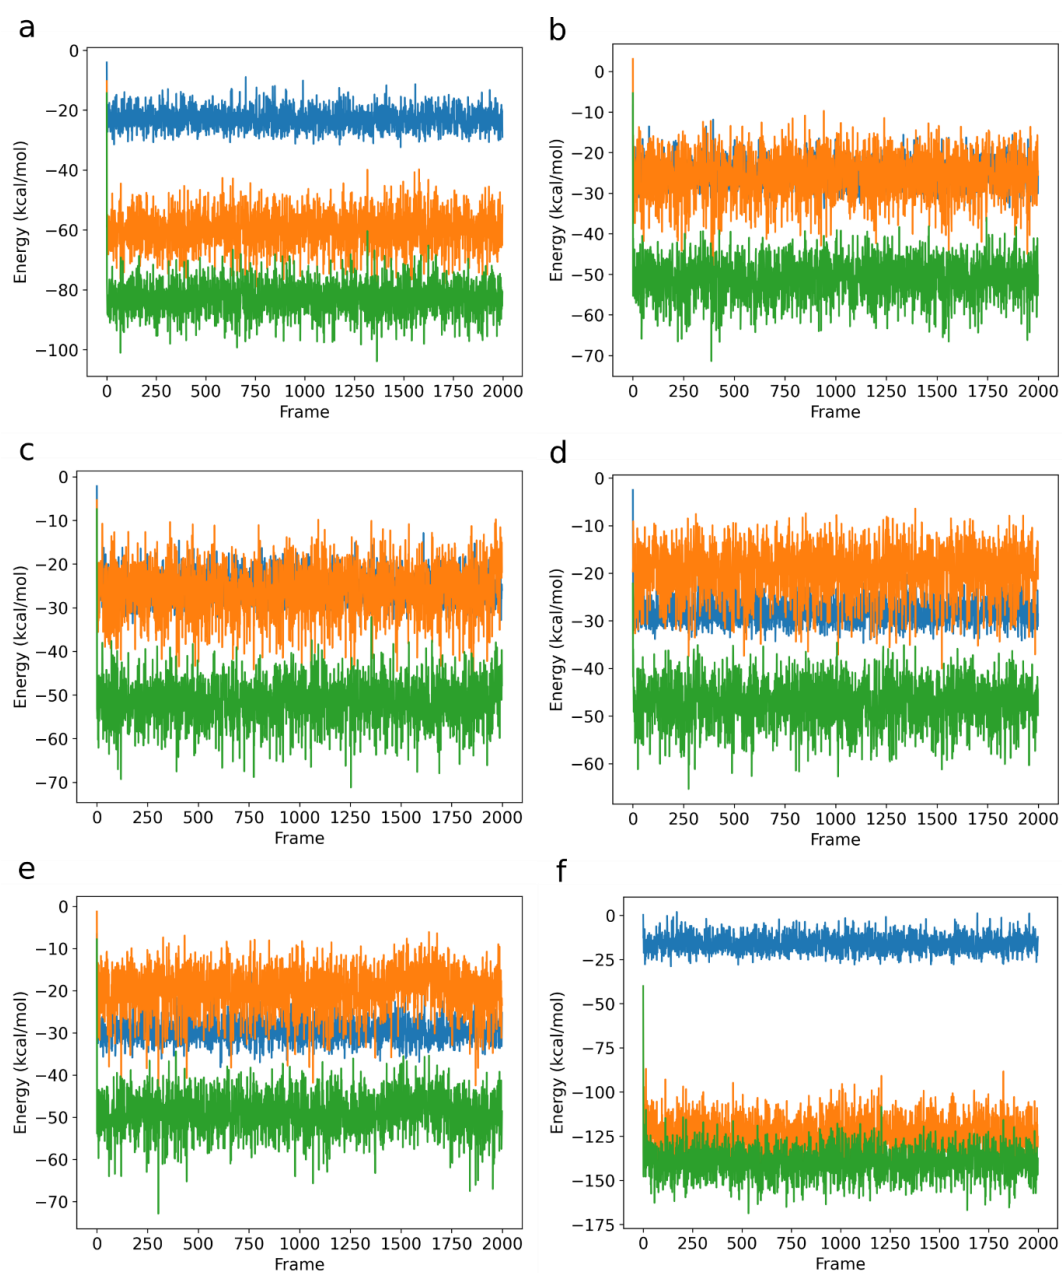

**Figure S2.** Interaction energy profiles of ligands in aqueous environment. (a) Carnosic acid, (b) Carnosol, (c) Rosmanol, (d) 7O-methylrosmanol, (e) 7O-ethylrosmanol, (f) Rosmarinic acid. The blue line represents the van der Waals contribution, the orange line the electrostatic contribution, and the green line the total interaction energy.

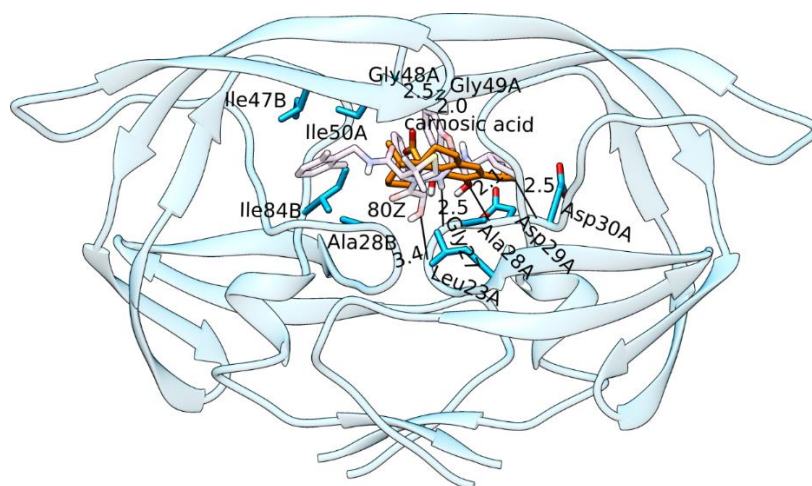

**Figure S3.** Comparison of binding poses between the native crystal ligand (transparent purple sticks) of HIV-1 protease (PDB ID 5YOK (blue ribbons), PDB Ligand ID 80Z) and carnosic acid (orange sticks). Aminoacid residues forming hydrophobic contacts are shown with blue sticks, whereas H-bond interactions are explicitly shown with black lines. The H-bond distances are measured in Å.

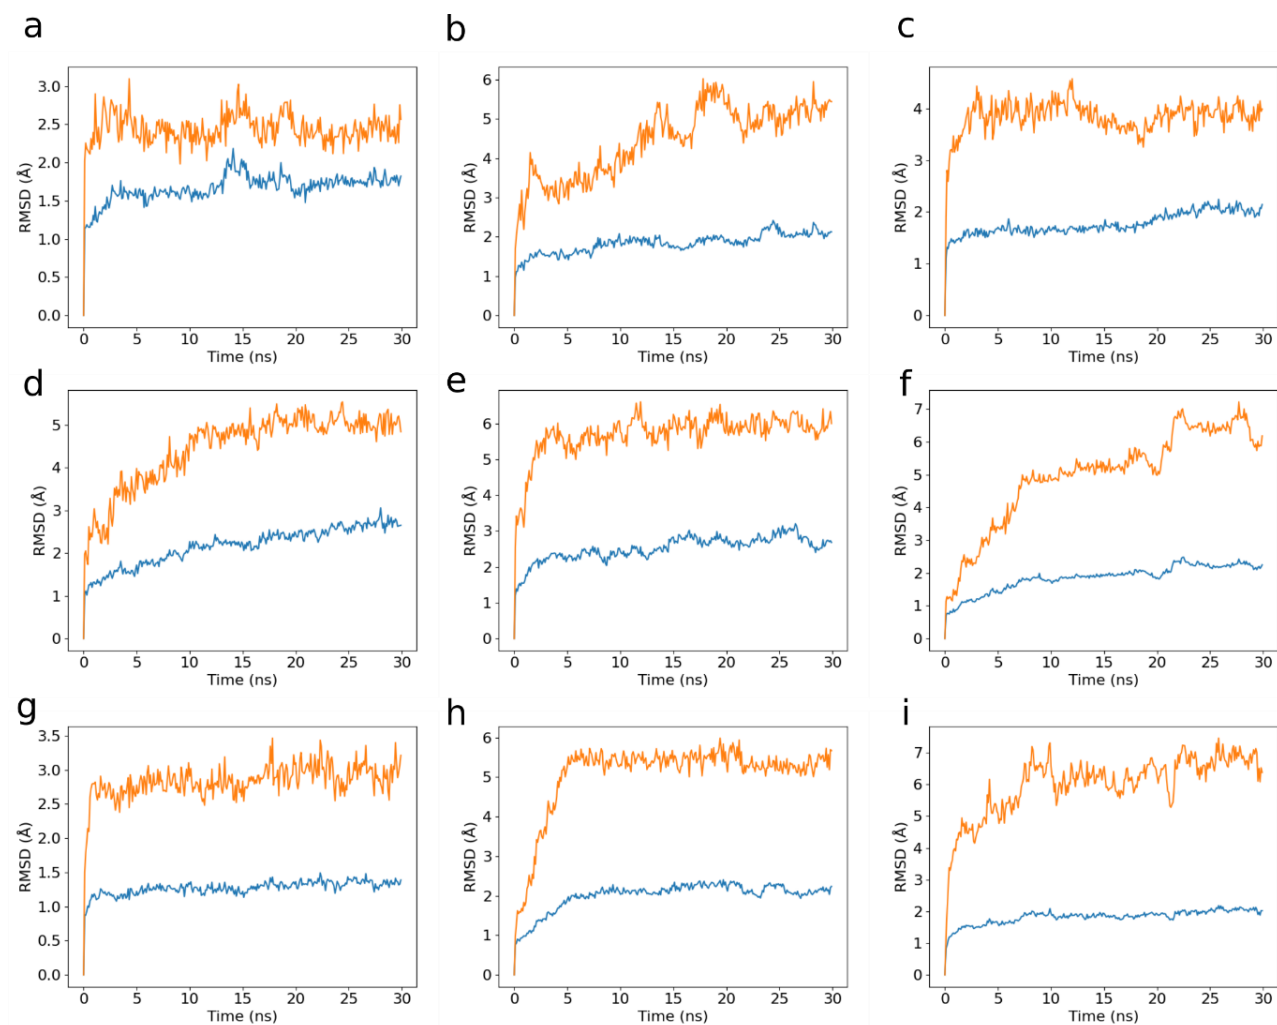

**Figure S4.** Averaged RMSD profiles across five replicas of the protein and ligand structure. (a) 5YOK-carnosic acid complex, (b) 5YOK-carnosol complex, (c) 5YOK-rosmanol complex, (d) 5YOK-7O-methylrosmanol complex, (e) 5YOK-7O-ethylrosmanol complex, (f) 4LUC-carnosic acid complex, (g) 4LUC-carnosol complex, (h) 4LUC-rosmanol complex, and (i) 2JKH-rosmarinic acid complex. Blue represents RMSD of the protein-ligand structure, whereas the orange for the ligand structure only.

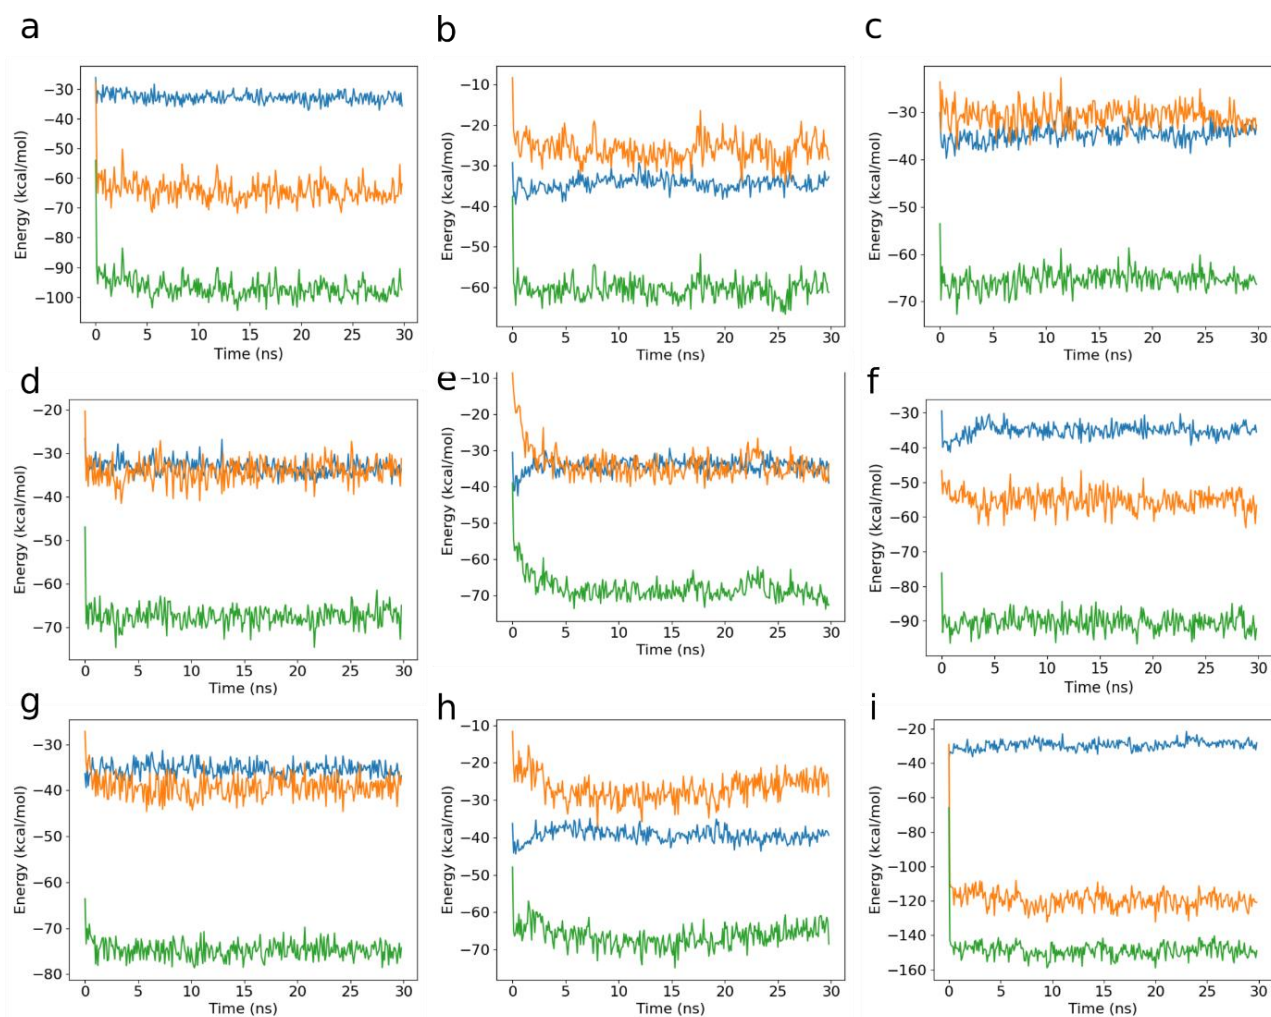

**Figure S5.** Averaged interaction energy profiles across five replicas of ligand to protein binding. (a) 5YOK-carnosic acid complex, (b) 5YOK-carnosol complex, (c) 5YOK-rosmanol complex, (d) 5YOK-7O-methylrosmanol complex, (e) 5YOK-7O-ethylrosmanol complex, (f) 4LUC-carnosic acid complex, (g) 4LUC-carnosol complex, (h) 4LUC-rosmanol complex, and (i) 2JKH-rosmarinic acid complex. The blue line represents the van der Waals contribution, the orange line the electrostatic contribution, and the green line the total interaction energy.

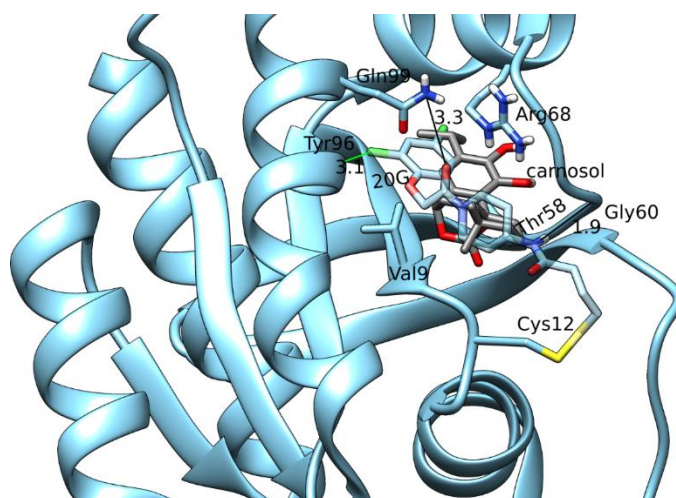

**Figure S6.** Comparison of binding poses between the native crystal ligand (transparent blue sticks) of K-RAS (PDB ID 4LUC) (blue ribbons), PDB Ligand ID 20G (grey sticks) and carnosol (grey sticks). Amino acid residues forming hydrophobic contacts are shown with blue sticks, whereas H-bond and halogen-bond interactions are explicitly shown with black and green lines, respectively. Their distances are measured in Å.



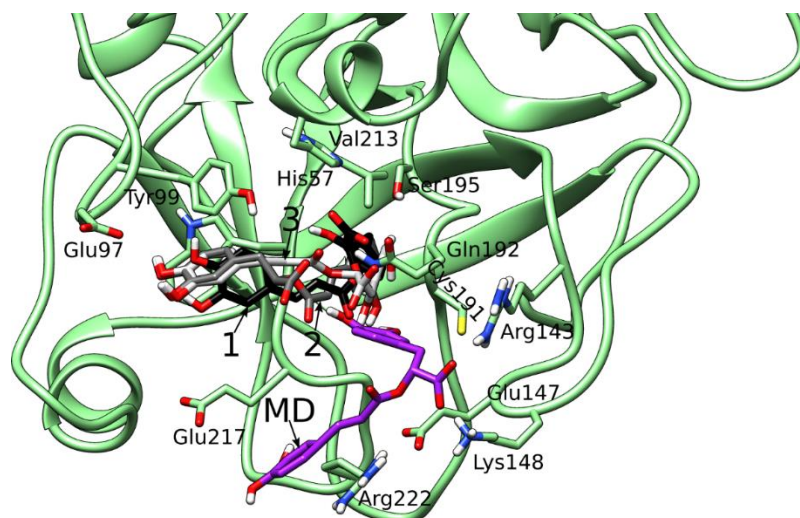

**Figure S7.** Three best scoring docking poses of rosmarinic acid. Rosmarinic acid with black carbons represents the best scoring pose, with dark grey the second best, and with light grey the third best pose. The latter was selected for subsequent MD simulations. Rosmarinic acid with purple carbons represents a prototypical pose at the end of the MD simulation. Factor X is shown with green cartoons and sticks.
